# Supplementary material
Source: MDPI journal article supplement (https://www.mdpi.com/2035-8377/14/3/52)
Supplement: s1 [file s1]

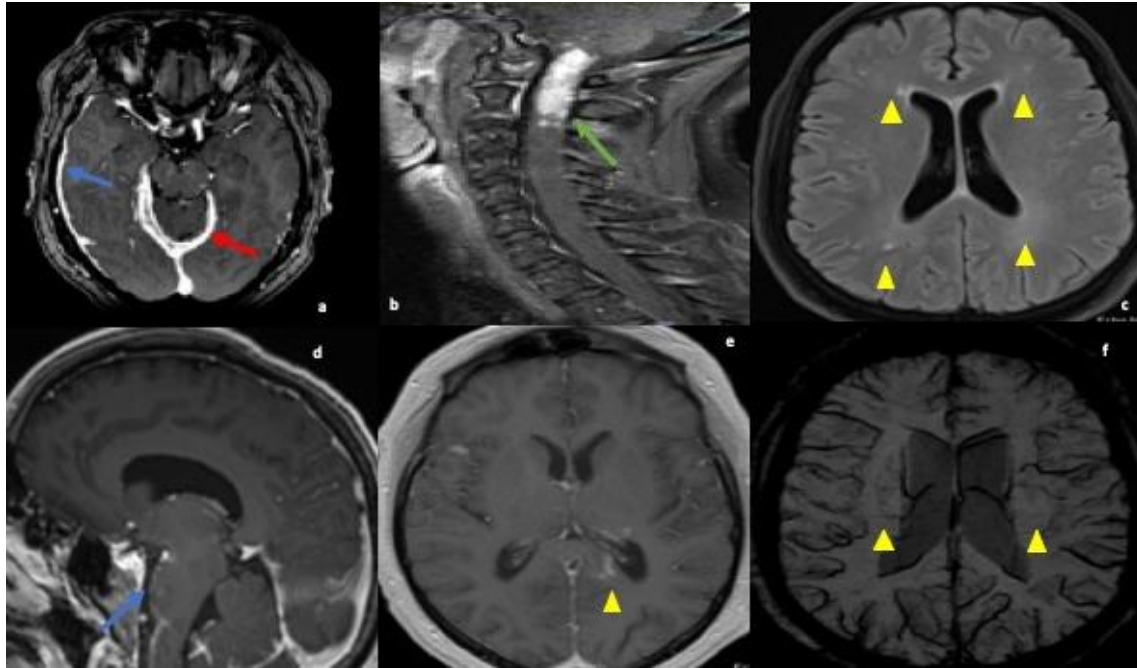

**Figure S1.** MRI axial T1 images 1(a) of the gadolinium-enhanced brain demonstrating dural thickening and enhancement of the right tentorium and cerebellopontine angle (blue and red arrow); 1(b) abnormal enhancement in cervicomedullary junction of cord (green arrow); 1(c) axial FLAIR-weighted MRI brain reveals hyperintense signal changes in atrium and frontal white matter bilateral (yellow arrowhead). 1(d,e) MRI brain sagittal and axial T1 post contrast images reveal leptomeningeal enhancement in basilar portion (blue arrow) and right atrium (yellow arrowhead); 1(f), and SWI images showing mild dilated medullary vein (yellow arrowhead).
